# Supplementary material for: Tailoring interfacial carrier dynamics via rationally designed uniform CsPbBrxI3−x quantum dots for high-efficiency perovskite solar cells
Source: Royal Society of Chemistry journal article supplement (doi:10.1039/d0ta09612a), 2020-01-01
Supplement: d0ta09612a1.pdf [file d0ta09612a1.pdf]

## Supporting Information

### Tailoring Interfacial Carrier Dynamics *via* Rationally Designed Uniform CsPbBr<sub>x</sub>I<sub>3-x</sub> Quantum Dots for High-Efficiency Perovskite Solar Cells

Shuguang Zhang,<sup>#ab</sup> Young Jun Yoon,<sup>#b</sup> Xun Cui,<sup>b</sup> Yajing Chang,<sup>b</sup> Meng Zhang,<sup>b</sup> Shuang Liang,<sup>b</sup> Cheng-Hsin Lu,<sup>b</sup> and Zhiqun Lin<sup>\*b</sup>

<sup>a</sup> *Department of Electronic Materials, School of Materials Science and Engineering, South China University of Technology, Guangzhou 510640, China.*

<sup>b</sup> *School of Materials Science and Engineering, Georgia Institute of Technology, Atlanta, Georgia 30332, USA.*

<sup>#</sup> *These authors contribute equally to this work*

*\*E-mail: [zhiqun.lin@mse.gatech.edu](mailto:zhiqun.lin@mse.gatech.edu)*

## Experimental Section

### **Materials:**

Methylammonium iodide (CH<sub>3</sub>NH<sub>3</sub>I; MAI) were synthesized according to the previous method,<sup>1</sup> and dried in a vacuum oven at 50 °C for 24 hrs.  $\beta$ -Cyclodextrin ( $\beta$ -CD), *Tert*-Butyl acrylate (*t*BA, 98%), Titanium diisopropoxide bis(acetylacetonate) (Tiacac, 75 wt% in isopropanol), titanium (IV) chloride (TiCl<sub>4</sub>, 99.995%), lead iodide (PbI<sub>2</sub>, 99.999%), Dimethylformamide (DMF, anhydrous, 99.9%), Tetrahydrofuran (THF, 99%), *N, N, N', N'', N''*-pentamethyldiethylene triamine (PMDETA, 99%), Trifluoroacetic acid (TFA, 99.9%) were purchased from Sigma Aldrich and used as received. Lead bromide (PbBr<sub>2</sub>, 99.995%) was purchased from TCI. Cesium bromide (CsBr, 99.999%) was purchased from STEM

Chemicals. Acetone (ACS reagent grade) and toluene (ACS reagent grade) were purchased from BDH Chemicals and used as received. CuBr (Sigma Aldrich, 98%) were purified via stirring overnight in acetic acid for 15 h, filtered, and washed subsequently with ethanol and diethyl ether completely, and dried under vacuum prior to use. *t*BA and styrene (St, Sigma-Aldrich,  $\geq 99\%$ ) was washed with 10% NaOH aqueous solution and water successively, dried over calcium hydride (CaH<sub>2</sub>), and distilled under reduced pressure. All other reagents were purified by common purification procedures.

### ***Synthesis of Multi-arm Star-like Poly(tert-Butyl Acrylate) (Star-like PtBA)***

Heptakis[2,3,6-tri-O-(2-bromo-2-methylpropionyl)]- $\beta$ -cyclodextrin (21Br- $\beta$ -CD) was synthesized according to a previously reported procedure.<sup>1, 2</sup> Star-like PtBA was synthesized through atom transfer radical polymerization (ATRP) of *t*BA monomers grafting from the 21Br- $\beta$ -CD macroinitiator. Briefly, CuBr (35.0 mg), *N, N, N', N'', N'''*-pentamethyldiethylene triamine (PMDETA, 85.0 mg), 21Br- $\beta$ -CD (50 mg), *t*BA (21 mL), and 2-butanone (21 mL) were mixed in an ampoule. The ampoule bubbled with argon to remove oxygen and then tightly sealed before placing in an oil bath at 60 °C for desired reaction time. To terminate the reaction, the ampoule was quenched by cooling the ampoule in liquid nitrogen and exposing the solution to air. The solution was then diluted with THF or acetone and passed through an alumina column to remove the CuBr catalyst, followed by fractional precipitation with a volume ratio of methanol/water of 1/1 to remove monomers and linear PtBA. The product was then fully dried at 40 °C under vacuum before further processing.

### ***Synthesis of Multi-arm Star-like Poly(tert-Butyl Acrylate)-block-Polystyrene (Star-like PtBA-*b*-PS)***

Star-like PtBA-*b*-PS was synthesized via ATRP of styrene (St) monomers grafting from the star-like PtBA containing terminal -Br groups as the ATRP initiator (i.e., star-like PtBA-Br). Briefly, star-like PtBA-Br (i.e., Br in PtBA macroinitiator) : CuBr : PMDETA : styrene = 1 : 1 : 2 : 800 (molar ratio) in anisole (1ml solvent per 1g styrene) were mixed in an ampoule. After bubbling with argon, the ampoule was then tightly sealed and placed in an oil bath at

90 °C. After the desired reaction time, the reaction was quenched by cooling the ampoule in liquid nitrogen and exposing the solution to air. The product solution was diluted with THF or acetone and passed through an alumina column to remove the catalyst, and then subsequently purified by fractional precipitation with methanol/water as the precipitator to remove unreacted monomers and linear PS. The product was then dried at 40 °C under vacuum for at least 24 hr prior to use.

### ***Synthesis of Multi-arm Star-like Poly(Acrylic Acid)-block-Polystyrene (PAA-*b*-PS) (Star-like PAA-*b*-PS)***

Star-like PAA-*b*-PS was prepared by hydrolyzing the tert-butyl ester groups of PtBA blocks of star-like PtBA-*b*-PS to acrylic acid groups. Briefly, Star-like PtBA-*b*-PS was first completely dissolved in dichloromethane, followed by the slow addition of trifluoroacetic acid. The solution was left to react at room temperature for 24 hr. The solvent was then evaporated under reduced pressure at 30 °C. The final product was then washed with methanol, and fully dried under vacuum at 40 °C for at least 24 hrs.

### ***Synthesis of PS-ligated CsPbBr<sub>3</sub> quantum dots (QDs)***

PS-ligated CsPbBr<sub>3</sub> QDs were synthesized by utilizing star-like PAA-*b*-PS as nanoreactors. The precursors are selectively partitioned in the space occupied by the inner hydrophilic PAA blocks of star-like PAA-*b*-PS. The strong coordination interaction between perovskite precursors (CsBr and PbBr<sub>2</sub>) and the carboxylic groups of inner PAA blocks of the nanoreactor facilitates the loading of precursors within the inner PAA compartment. Upon introducing precursors-loaded star-like PAA-*b*-PS into toluene (a non-solvent for CsPbBr<sub>3</sub>), PS-ligated CsPbBr<sub>3</sub> QDs are instantaneously formed. In a typical procedure, star-like PAA-*b*-PS nanoreactors, CsBr and PbBr<sub>2</sub> were dissolved in DMF at room temperature. In order for the precursors to preferentially situate within the inner PAA compartment of the nanoreactor, the solution was stirred for more than 24 hrs. The solution was then added into toluene, upon which CsPbX<sub>3</sub> QDs immediately formed in solution.

### ***Synthesis of PS-ligated CsPbBr<sub>x</sub>I<sub>3-x</sub> Quantum dots (QDs)***

PS-ligated CsPbBr<sub>x</sub>I<sub>3-x</sub> QDs were synthesized by anion exchange method, which has been reported in the literature. Briefly, after the synthesis of PS-capped CsPbBr<sub>3</sub> QDs, zinc iodide solution was firstly prepared by dissolving an appropriate amount of zinc iodide into methanol. The zinc iodide solution was then added in drops into a PS-ligated CsPbBr<sub>3</sub> QDs-containing vial during which virgorous stirring was on process. The Br/I ratio of CsPbBr<sub>x</sub>I<sub>3-x</sub> QDs was judiciously tailored by virgously adjusting the molar ratio of zinc iodide to that of PS-ligated CsPbBr<sub>3</sub> QDs.

### ***Fabrication of Perovskite Solar Cells with and without PS-ligated CsPbBr<sub>x</sub>I<sub>3-x</sub> Quantum Dots***

Fluorine-doped tin oxide (FTO)-coated transparent glass substrates were etched with HCl (4 M) and metallic zinc powder, and sequentially ultrasonically cleaned using grease remover, DI water, acetone, n-butyl alcohol, and ethanol for 20 min, respectively. The clean FTO was then treated using oxygen plasma for 15 min, followed by spin-coating 0.15 M titanium diisopropozisw bis(acetylacetonate) solution at 3000 r.p.m for 30 s. The titanium-containing precursor film was placed on the hot plate at 125 °C for 10 min and then annealed in the furnace at 500 °C for 60 min. The resulting TiO<sub>2</sub> was then immersed into a 20-mM TiCl<sub>4</sub> solution at 70 °C for 40 min to generate a compact TiO<sub>2</sub> film. Then a layer of mesoporous TiO<sub>2</sub> was spun on top of the compact TiO<sub>2</sub> film at 3000 r.p.m for 30 s using TiO<sub>2</sub> paste, followed by a rapid annealing at 500 °C for 30 min. The MAPbI<sub>3</sub> layer was then spin-coated on mesoporous TiO<sub>2</sub> surface using the tranditional approach at 4500 r.p.m for 35s using diethyl ether as anti-solvent solution inside the glove box filled with Ar atmosphere. After diethyl ether-induced antisolvent process, all the samples were positioned on the surface of a hot plate at 100 °C for 15 min for further crystallization of MAPbI<sub>3</sub>. The PS-ligated CsPbBr<sub>x</sub>I<sub>3-x</sub> QDs of varied compositions and concentrations were then spin-coated on top of the MAPbI<sub>3</sub> film at 3000 rpm for 30 s, followed by a post-annealing process at 100 °C for 10 min. For the Spiro-OMeTAD hole-transport layer deposition, 72.3 mg Spiro-OMeTAD power was dissolved into 1 mL Chlorobenzene, mixed with 28.8 µl 4-tert-butylpyridine (TBP) and 17.5 µl Li-bis(trifluoromethanesulfonyl) imide (Li-TFSI) using acetonitrile as solvent (520 mg/ml). The resulting Spiro-OMeTAD solution was

spun on the PS-ligated CsPbBr<sub>x</sub>I<sub>3-x</sub> QDs-deposited MAPbI<sub>3</sub> film at 3000 r.p.m for 30 s. Finally, Ag electrode of 150 nm was thermally evaporated. Control devices without the use of PS-ligated CsPbBr<sub>x</sub>I<sub>3-x</sub> QDs to interface MAPbI<sub>3</sub> and Spiro-OMeTAD were also fabricated with the same preparative procedures for comparison.

## Characterization

The number average molecular weight,  $M_n$ , and polydispersity index, PDI, were measured by gel permeation chromatography (GPC) equipped with an LC-20 AD HPLC pump and a refractive index detector (RID-10A, 120 V) at room temperature. All proton nuclear magnetic resonance (NMR) spectra of star-like PtBA and star-like PtBA-*b*-PS and star-like PAA-*b*-PS were presented using a Varian VXR-300 microscopy. The optical properties of MAPbI<sub>3</sub> film and PS-ligated CsPbBr<sub>x</sub>I<sub>3-x</sub> QDs were characterized by UV-vis spectrophotometer (SHIMADZU, UV-2600) with Halogen lamp and Deuterium lamp as excitation sources. The crystal structures of MAPbI<sub>3</sub> with and without PS-ligated CsPbBr<sub>x</sub>I<sub>3-x</sub> QDs decoration were characterized by the XRD (X'pert PRO, Netherlands) using Cu K $\alpha_1$  ( $\lambda=1.5401$  Å) radiation. The scanning electron microscopy (SEM) images were obtained using Hitachi SU8000 equipped with high energy electron sources and stunningly sensitive detector system. The steady-state photoluminescence (PL) was collected using Spectrofluorometer (RF-5301PC, SHIMADZU). The time-resolved PL measurements were performed using a Photon Technology International (PTI) LaserStrobe Spectrofluorometer equipped with a PTI GL-3300 nanosecond nitrogen laser ( $\lambda=337$  nm) and Photomultiplier tubes (PMT) together with time-correlated single photon counting (TCSPC) for single collection and analysis. For perovskite solar cells characterization, the current density-voltage ( $J$ - $V$ ) curves were measured using the Newport AM 1.5G solar simulator together with a Keithley 2601A multisource meter under ambient conditions. The  $J$ - $V$  curves were scanned in both forward and reverse directions with varied scanning rate and time interval. The external quantum efficiency (EQE) measurement was performed using a Newport Quantum Efficiency Measurement Kit. Electrochemical Impedance spectroscopy was collected using the Zennium electrochemical workstation (Zahner). The controlled intensity modulated photovoltage spectroscopy (CIMVS) and controlled intensity modulated photocurrent spectroscopy (CIMPS) measurements were

carried out using the Zahner electrochemical workstation, together with PP211 power potentiostat and light source control module.

Figures and Tables

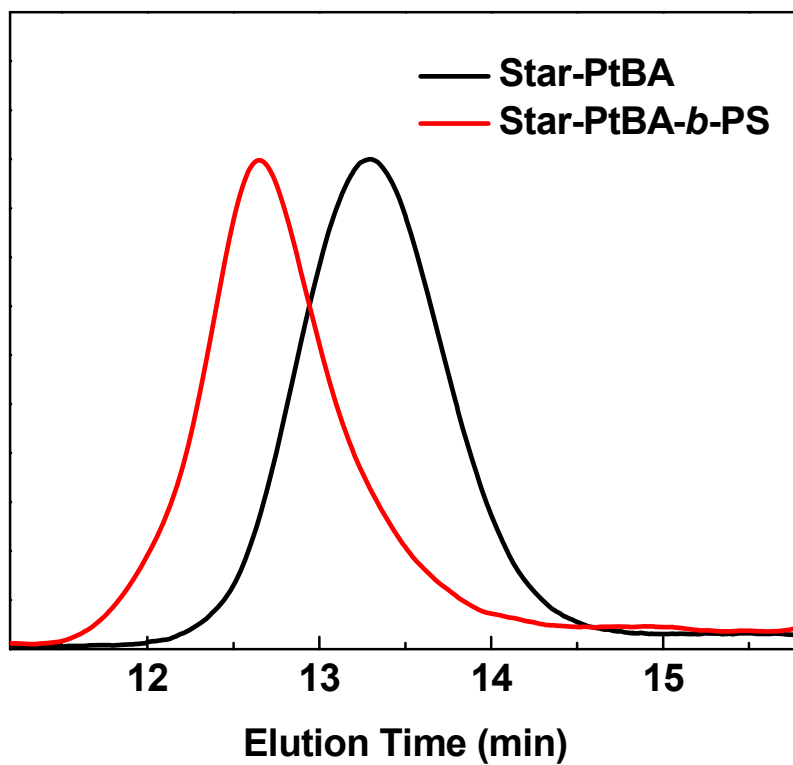

Figure S1. GPC traces of star-PtBA and star-PtBA-*b*-PS, respectively.

**Table S1.** Summary of molecular weights of amphiphilic star-like PAA-*b*-PS diblock copolymers.

| <b>Samples</b>                       | $M_n$<br>(kg/mol) | <b>PDI</b> | $M_n$ , PAA per<br>arm (kg/mol)<br>by<br>$^2\text{H-NMR}$ | $M_n$ , PS per<br>arm (kg/mol)<br>by<br>$^3\text{H-NMR}$ |
|--------------------------------------|-------------------|------------|-----------------------------------------------------------|----------------------------------------------------------|
| <b>Star-like PtBA</b>                | 193               | 1.14       | N/A                                                       | N/A                                                      |
| <b>Star-like<br/>PAA-<i>b</i>-PS</b> | 307               | 1.22       | 11.0                                                      | 7.7                                                      |

Notes:  $M_n$  = number average molecular weight.  $PDI$  = polydispersity index.



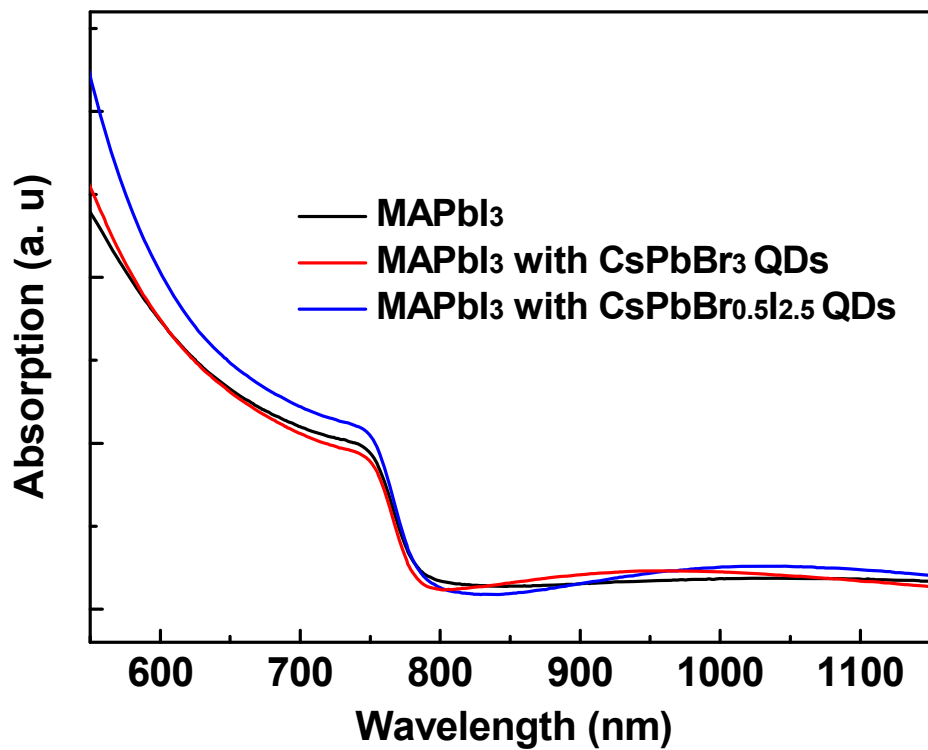

**Figure S2.** UV-vis absorption spectra of perovskite MAPbI<sub>3</sub> film with and without the PS-ligated -CsPbX<sub>3</sub> QDs modification, respectively.

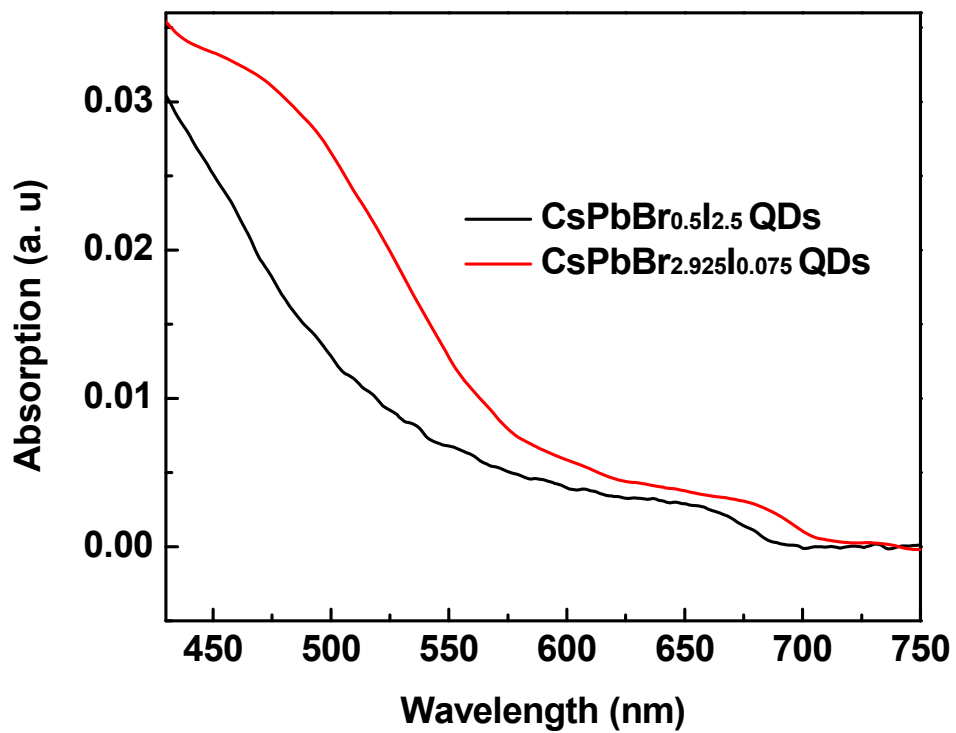

**Figure S3.** UV-Vis absorption spectra of PS-ligated CsPbBr<sub>0.5</sub>I<sub>2.5</sub> and CsPbBr<sub>0.075</sub>I<sub>2.925</sub> QDs, respectively.

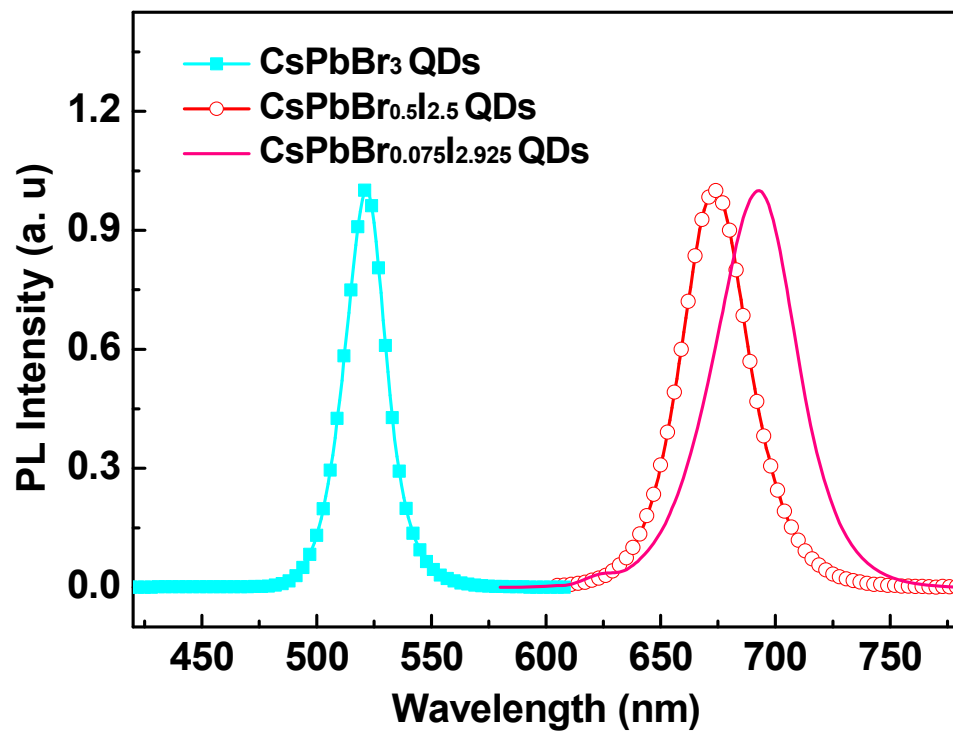

**Figure S4.** Normalized steady-state PL of PS-ligated CsPbBr<sub>3</sub>, CsPbBr<sub>0.5</sub>I<sub>2.5</sub>, and CsPbBr<sub>0.075</sub>I<sub>2.925</sub> QDs, respectively.

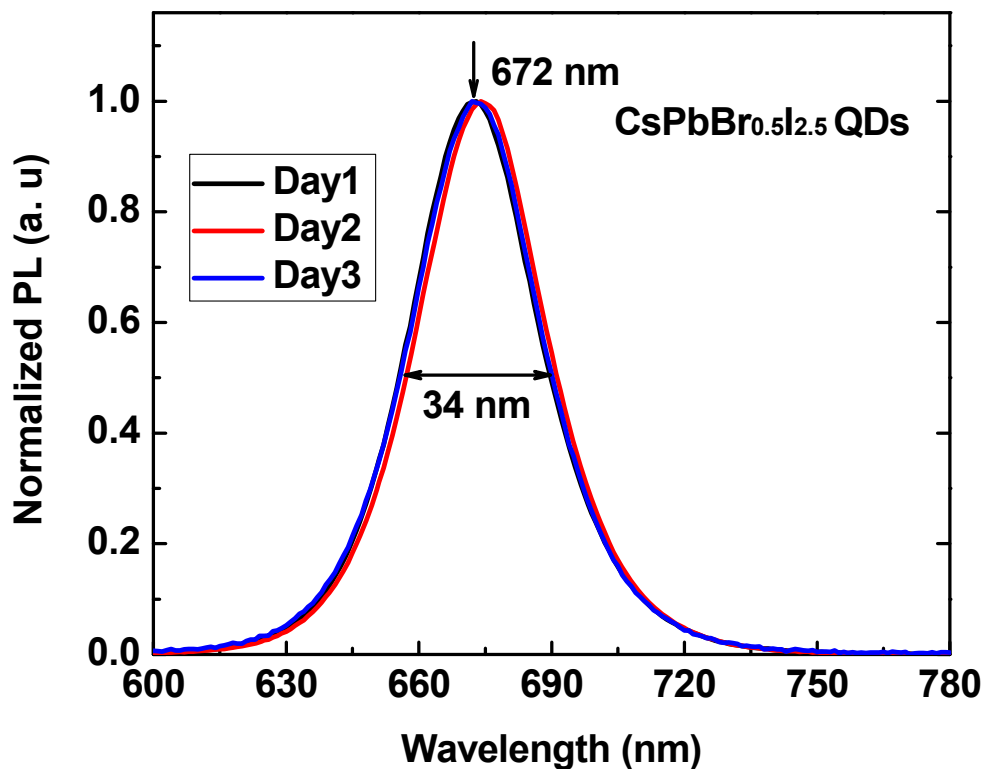

**Figure S5.** Normalized steady-state PL of PS-ligated CsPbBr<sub>0.5</sub>I<sub>2.5</sub> QDs, synthesized by capitalizing on star-like PAA-*b*-PS diblock copolymer as nanoreactor, after 1 day, 2 days, and 3 days at room temperature, respectively. The PS-ligated CsPbBr<sub>0.5</sub>I<sub>2.5</sub> QDs solution was stored under ambient condition, exposing to air (humidity ~30 %) and room light without stirring. The negligible peak shift is clearly evident, indicating outstanding colloidal stability of PS-ligated CsPbBr<sub>0.5</sub>I<sub>2.5</sub> QDs.

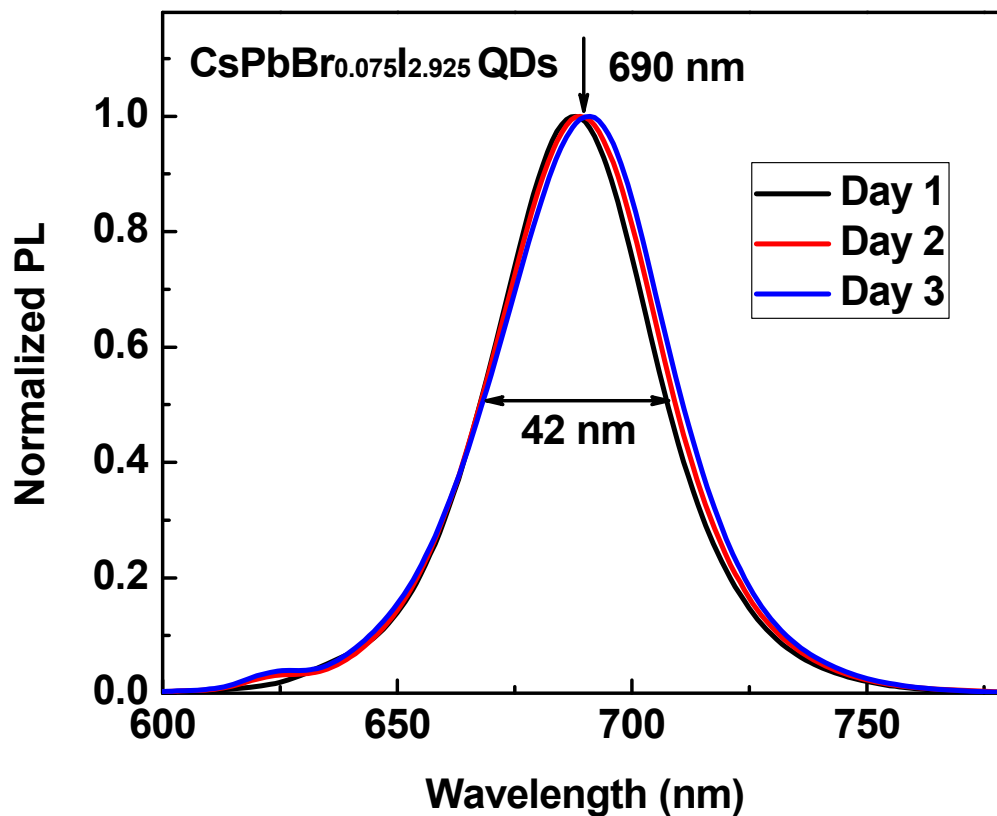

**Figure S6.** Normalized steady-state PL of PS-ligated CsPbBr<sub>0.075</sub>I<sub>2.925</sub> QDs, synthesized by capitalizing on star-like PAA-*b*-PS diblock copolymer as nanoreactor, after 1 day, 2 days, and 3 days at room temperature, respectively. The CsPbBr<sub>0.075</sub>I<sub>2.925</sub> QDs solution was stored under ambient condition, exposing to air (humidity ~30 %) and room light without stirring. Similar to PS-ligated CsPbBr<sub>0.5</sub>I<sub>2.5</sub> QDs, these QDs show excellent stability with the PL peak position centered around 690 nm.

**Table S2.** Summary of PL decay parameters obtained from a biexponential fitting of the time-resolved PL decay curves for CsPbBr<sub>3</sub> and CsPbBr<sub>0.5</sub>I<sub>2.5</sub> QDs, respectively.

| <b>Sample</b>                              | $A_1$ | $\tau_1$ (ns) | $A_2$ | $\tau_2$ (ns) | $\tau_{ave}$ (ns) |
|--------------------------------------------|-------|---------------|-------|---------------|-------------------|
| <b>CsPbBr<sub>3</sub></b>                  | 0.562 | 39.49         | 0.066 | 204.00        | 101.60            |
| <b>CsPbBr<sub>0.5</sub>I<sub>2.5</sub></b> | 0.496 | 25.45         | 0.335 | 128.86        | 145.46            |

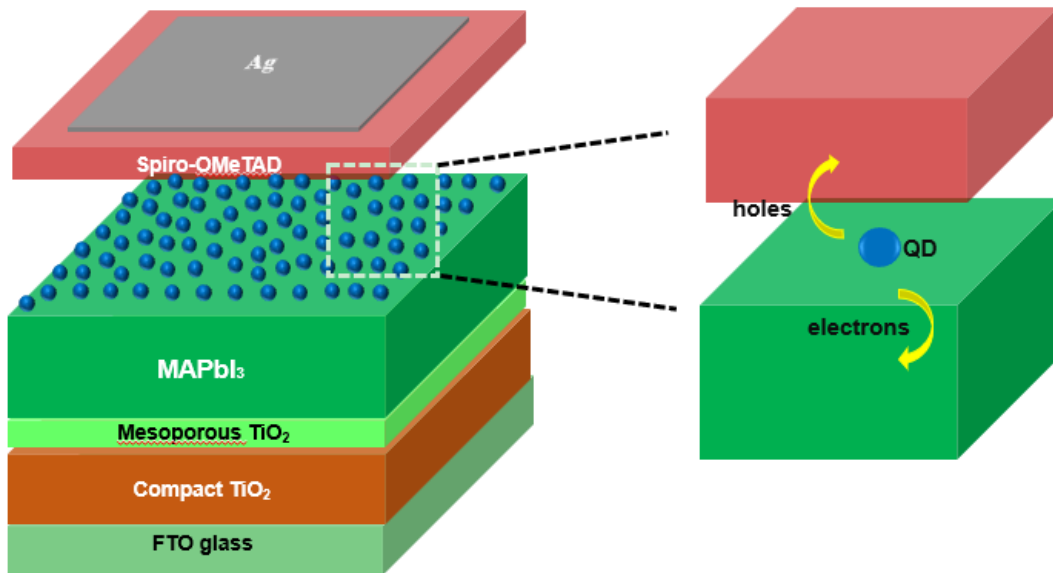

**Figure S7.** Schematic illustration of the device structure composed of CsPbBr<sub>0.5</sub>I<sub>2.5</sub> QDs situated at the MAPbI<sub>3</sub>/Spiro-OMeTAD interface.

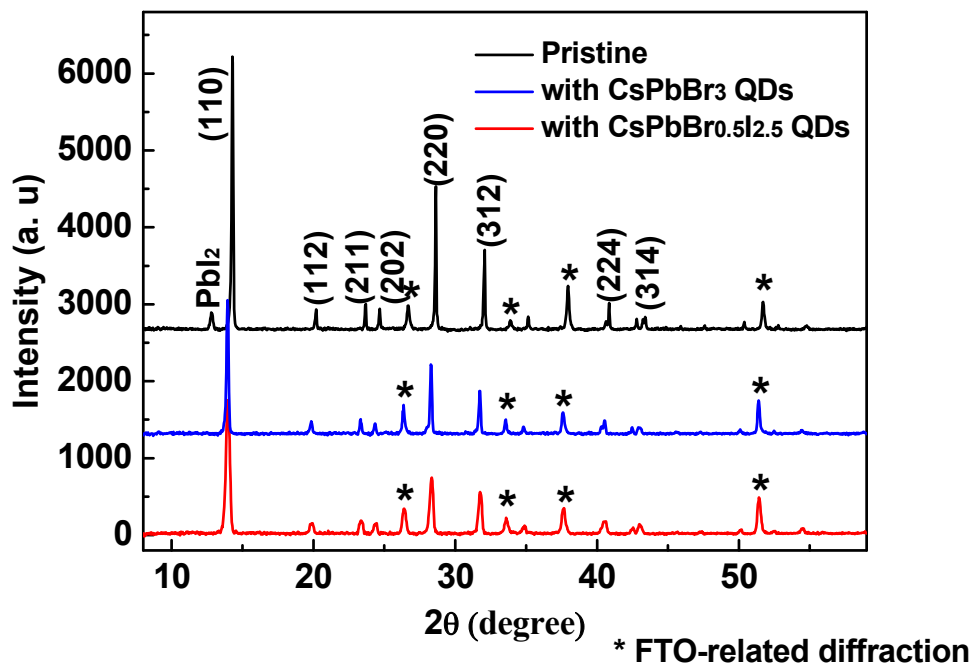

**Figure S8.** XRD profiles of MAPbI<sub>3</sub> film without and with the deposition of PS-ligated CsPbBr<sub>3</sub> and CsPbBr<sub>0.5</sub>I<sub>2.5</sub> QDs on the surface. The small peak at  $2\theta$  of  $\sim 12.8^\circ$  can be attributed to the PbI<sub>2</sub>-related diffraction. No characteristic peaks of PS-ligated CsPbBr<sub>3</sub> and CsPbBr<sub>0.5</sub>I<sub>2.5</sub> QDs can be seen owing to the inappreciable amount of QDs on the MAPbI<sub>3</sub> surface. Reduced intensity of MAPbI<sub>3</sub> with QDs can be ascribed to the QDs scattering-induced diffraction reduction.



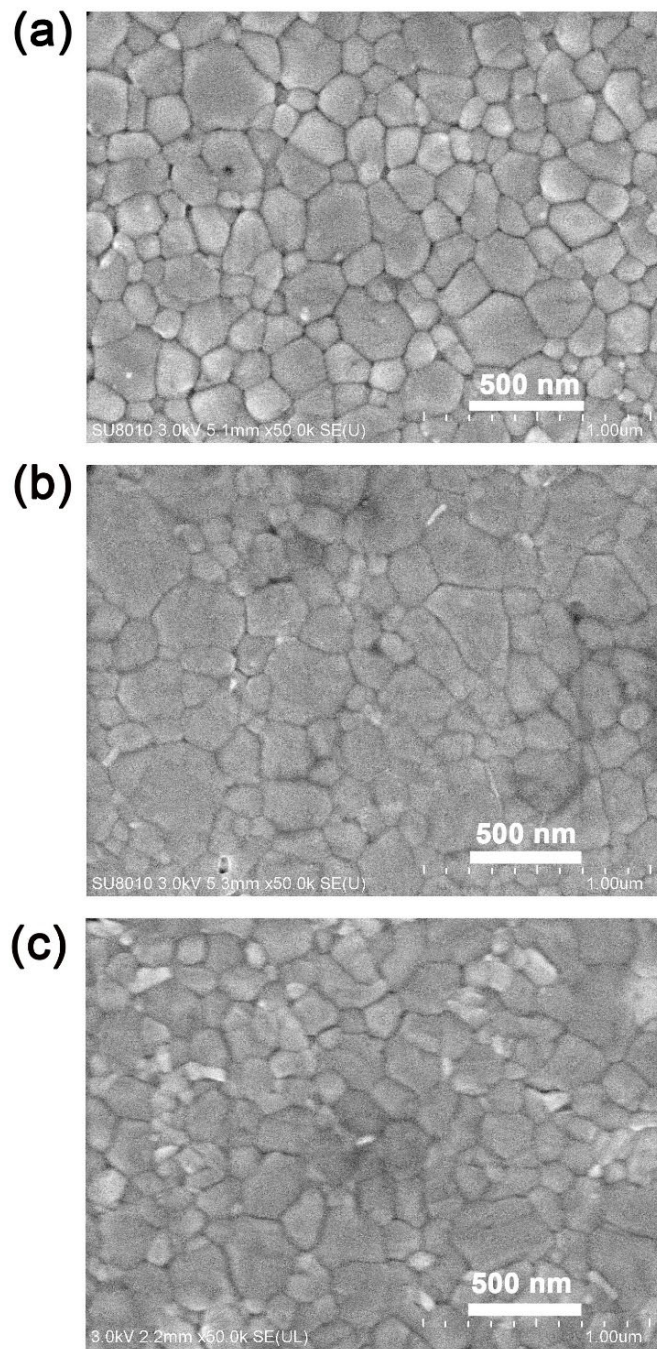

**Figure S9.** Top-view SEM images of (a) pristine MAPbI<sub>3</sub> film, and with (b) PS-ligated CsPbBr<sub>3</sub> and (c) PS-ligated CsPbBr<sub>0.5</sub>I<sub>2.5</sub> QDs deposited on the surface.

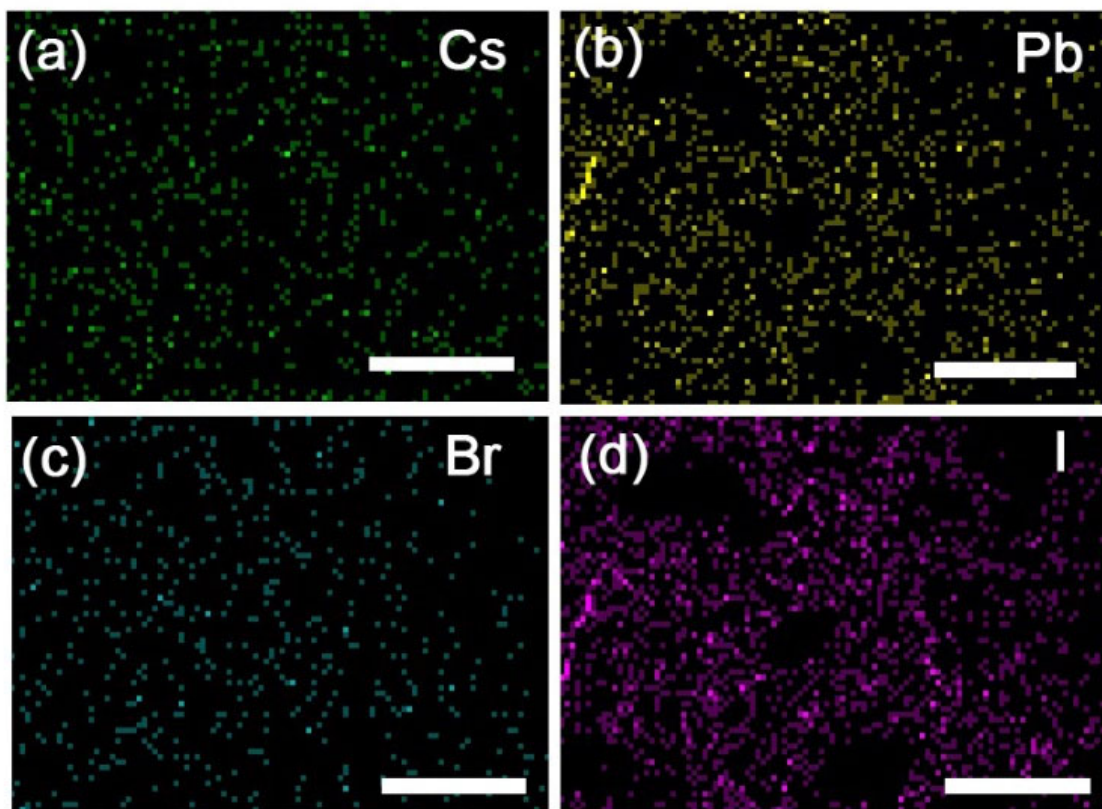

**Figure S10.** EDS mapping images of (a) Cs, (b) Pb, (c) Br and (d) I from the MAPbI<sub>3</sub> film with PS-ligated CsPbBr<sub>0.5</sub>I<sub>2.5</sub> QDs deposited on the surface. High-density Pb is due to the dual contribution from both CsPbBr<sub>3</sub> PQDs and MAPbI<sub>3</sub> (scale bar = 3 μm).

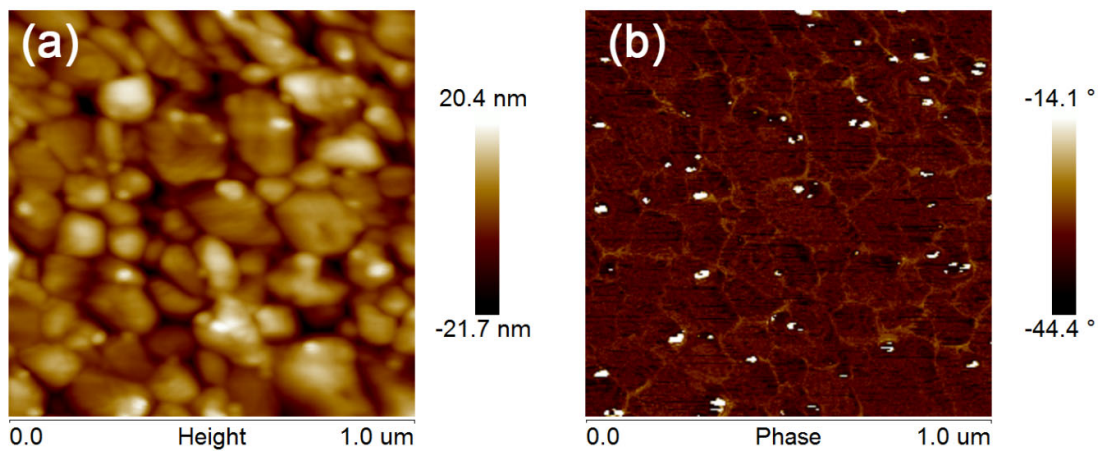

**Figure S11.** AFM (a) height and (b) phase images of perovskite MAPbI<sub>3</sub> film deposited with CsPbBr<sub>0.5</sub>I<sub>2.5</sub> QDs.

**Table S3.** Photovoltaic parameters of pristine perovskite solar cell (PSC; control device) as well as PSCs incorporated with PS-ligated CsPbBr<sub>3</sub> QDs and CsPbBr<sub>0.5</sub>I<sub>2.5</sub> QDs.

| <b>Devices</b>                             | <b><math>V_{oc}</math> (V)</b> | <b><math>J_{sc}</math> (mA/cm<sup>2</sup>)</b> | <b><math>FF</math> (%)</b> | <b><math>PCE</math> (%)</b> |
|--------------------------------------------|--------------------------------|------------------------------------------------|----------------------------|-----------------------------|
| <b>Control</b>                             | 1.05                           | 21.38                                          | 71.96                      | 16.15                       |
| <b>CsPbBr<sub>3</sub></b>                  | 1.10                           | 19.17                                          | 56.58                      | 11.93                       |
| <b>CsPbBr<sub>0.5</sub>I<sub>2.5</sub></b> | 1.07                           | 23.20                                          | 72.51                      | 18.00                       |

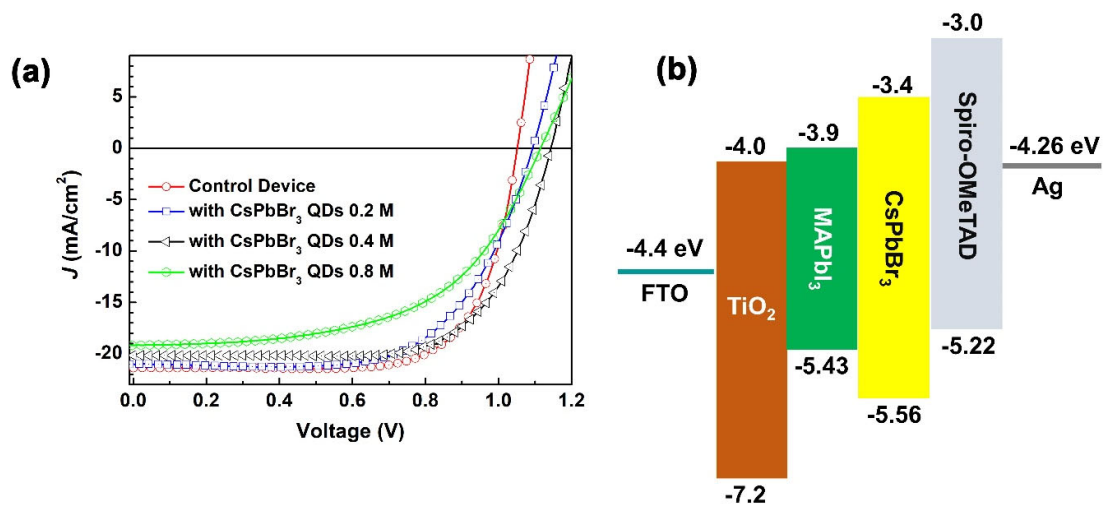

**Figure S12.** (a)  $J$ - $V$  curves of perovskite solar cells without and with PS-ligated CsPbBr<sub>3</sub> QDs deposited at various concentrations. (b) Schematic illustration of energy levels of perovskite solar cells with CsPbBr<sub>3</sub> incorporated.

**Table S4.** Photovoltaic parameters of perovskite solar cells without and with the incorporation of CsPbBr<sub>3</sub> QDs of various concentrations at the MAPbI<sub>3</sub>/Spiro-OMeTAD interface.

| <b>CsPbBr<sub>3</sub> QD<br/>(mol/L)</b> | <b><i>V</i><sub>oc</sub> (V)</b> | <b><i>J</i><sub>sc</sub> (mA/cm<sup>2</sup>)</b> | <b><i>FF</i> (%)</b> | <b><i>PCE</i> (%)</b> |
|------------------------------------------|----------------------------------|--------------------------------------------------|----------------------|-----------------------|
| <b>0</b>                                 | 1.05                             | 21.38                                            | 71.96                | 16.15                 |
| <b>0.2</b>                               | 1.09                             | 21.00                                            | 64.48                | 14.76                 |
| <b>0.4</b>                               | 1.15                             | 20.16                                            | 68.50                | 15.88                 |
| <b>0.8</b>                               | 1.10                             | 19.17                                            | 56.58                | 11.93                 |

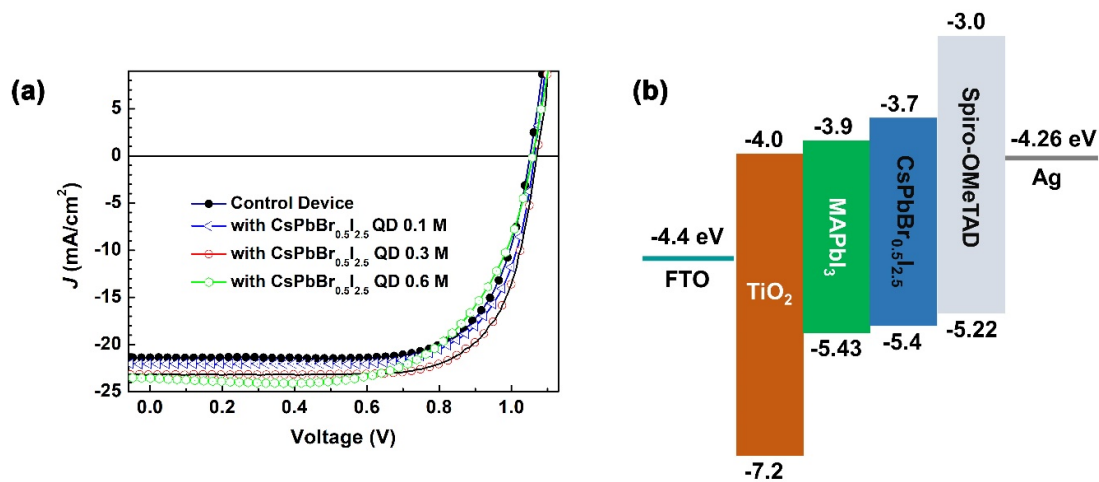

**Figure S13.** (a) *J-V* curves of perovskite solar cells before and after the deposition of CsPbBr<sub>0.5</sub>I<sub>2.5</sub> quantum dots of various concentrations at the MAPbI<sub>3</sub>/Spiro-OMeTAD interface. (b) Schematic illustration of energy levels of CsPbBr<sub>0.5</sub>I<sub>2.5</sub> QDs-incorporated perovskite solar cells.

**Table S5.** Photovoltaic parameters of the perovskite solar cells without and with the incorporation of CsPbBr<sub>0.5</sub>I<sub>2.5</sub> QDs of various concentrations at the MAPbI<sub>3</sub>/Spiro-OMeTAD interface.

| <b>CsPbBr<sub>0.5</sub>I<sub>2.5</sub> QD<br/>(mol/L)</b> | <b><i>V</i><sub>oc</sub> (V)</b> | <b><i>J</i><sub>sc</sub> (mA/cm<sup>2</sup>)</b> | <b><i>FF</i> (%)</b> | <b><i>PCE</i> (%)</b> |
|-----------------------------------------------------------|----------------------------------|--------------------------------------------------|----------------------|-----------------------|
| <b>0</b>                                                  | 1.05                             | 21.38                                            | 71.96                | 16.15                 |
| <b>0.1</b>                                                | 1.06                             | 22.05                                            | 70.85                | 16.56                 |
| <b>0.3</b>                                                | 1.07                             | 23.20                                            | 72.51                | 18.00                 |
| <b>0.6</b>                                                | 1.06                             | 23.00                                            | 65.95                | 16.08                 |



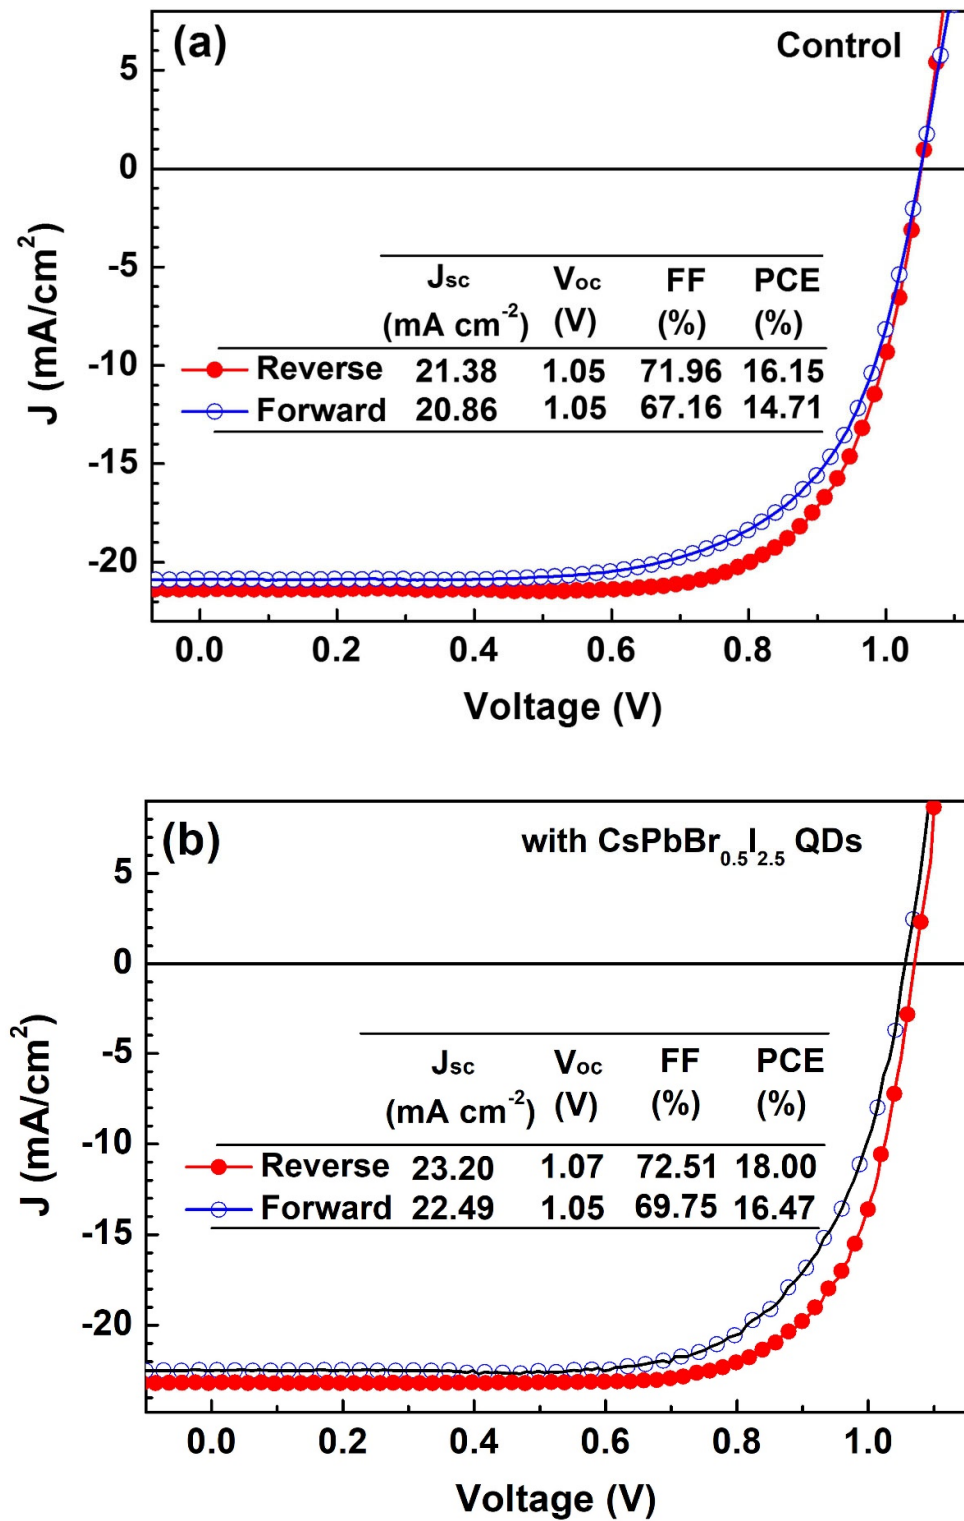

**Figure S14.**  $J$ - $V$  characteristics for (a) control device and (b)  $\text{CsPbBr}_{0.5}\text{I}_{2.5}$  QDs-incorporated device.

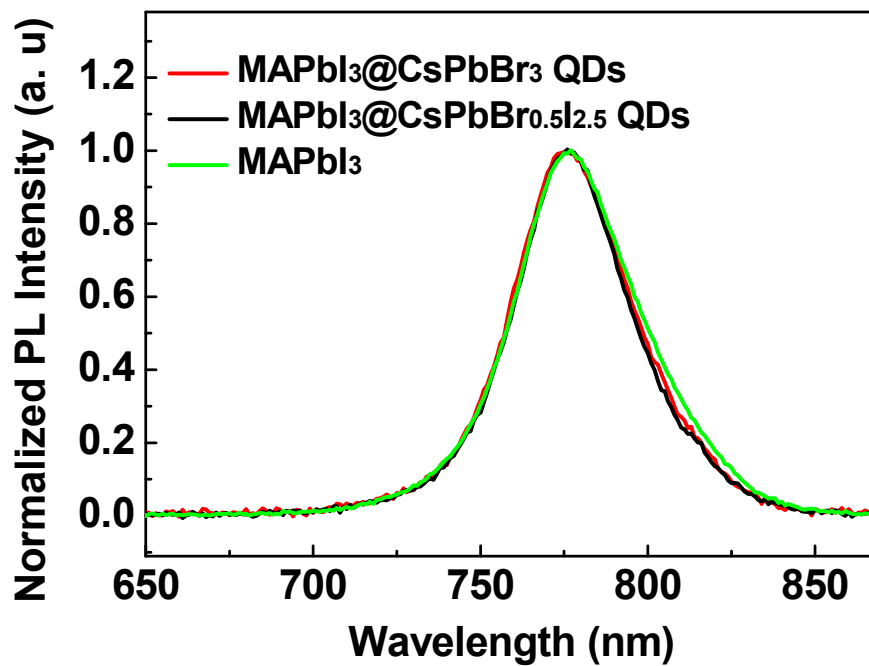

**Figure S15.** Normalized PL of perovskite films with and without PS-ligated CsPbBr<sub>x</sub>I<sub>3-x</sub> QDs, respectively.

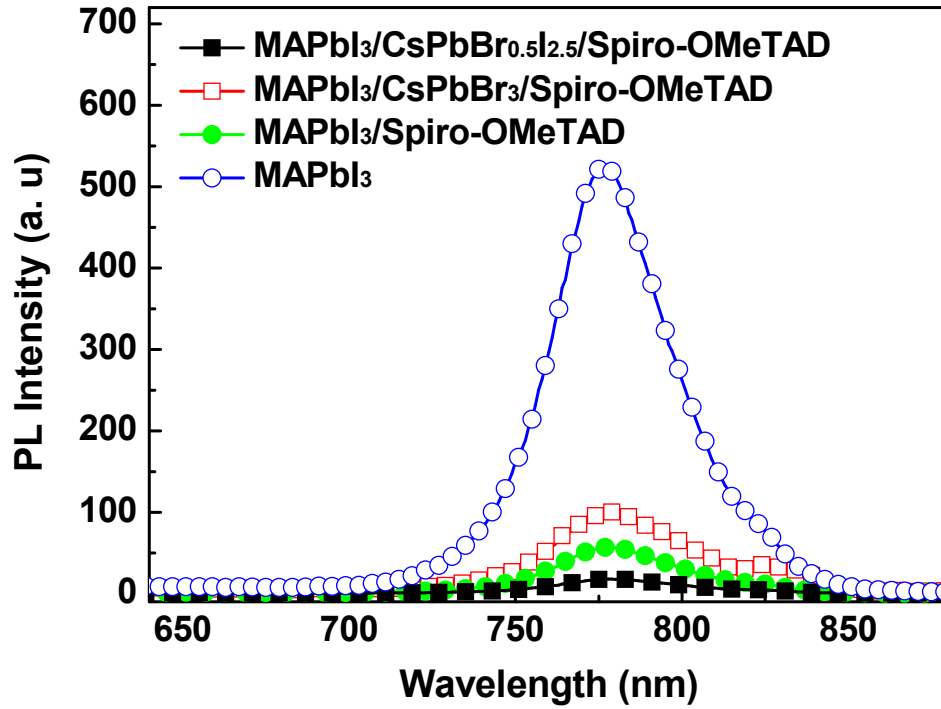

**Figure S16.** Steady-state photoluminescence spectra for pure MAPbI<sub>3</sub> film and MAPbI<sub>3</sub> film coated with Spiro-OMeTAD HTL as well as samples with PS-ligated CsPbBr<sub>3</sub> and CsPbBr<sub>0.5</sub>I<sub>2.5</sub> QDs sandwiched between MAPbI<sub>3</sub> and Spiro-OMeTAD layers.

**Table S6.** Summary of PL decay parameters from a biexponential fitting of time-resolved PL decay curves for pristine MAPbI<sub>3</sub> and MAPbI<sub>3</sub>/PS-ligated CsPbBr<sub>0.5</sub>I<sub>2.5</sub> QDs, respectively.

| <b>Sample</b>                                                     | <b><math>A_1</math></b> | <b><math>\tau_1</math> (ns)</b> | <b><math>A_2</math></b> | <b><math>\tau_2</math> (ns)</b> | <b><math>\tau_{ave}</math> (ns)</b> |
|-------------------------------------------------------------------|-------------------------|---------------------------------|-------------------------|---------------------------------|-------------------------------------|
| <b>MAPbI<sub>3</sub></b>                                          | 0.680                   | 17.76                           | 0.206                   | 102.59                          | 71.74                               |
| <b>MAPbI<sub>3</sub>/<br/>CsPbBr<sub>0.5</sub>I<sub>2.5</sub></b> | 0.136                   | 26.00                           | 0.735                   | 129.64                          | 125.93                              |

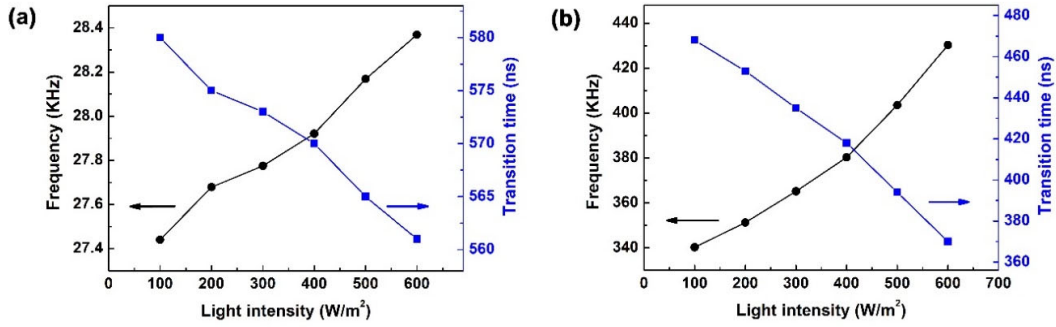

**Figure S17.** The intensity modulated photocurrent (IMPS) results of PSCs with and without the deposition of PS-ligated CsPbBr<sub>0.5</sub>I<sub>2.5</sub> QDs at the MAPbI<sub>3</sub>/Spiro-OMeTAD interface. Frequency and transition time ( $\tau_d$ ) as a function of incident light intensity for (a) control device, and (b) CsPbBr<sub>0.5</sub>I<sub>2.5</sub> QDs-incorporated device.

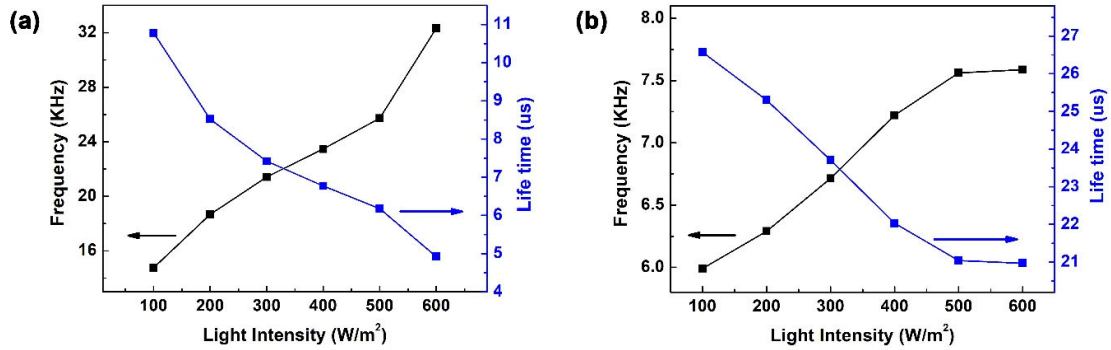

**Figure S18.** The intensity modulated photovoltage (IMVS) results of PSCs with and without the deposition of PS-ligated CsPbBr<sub>0.5</sub>I<sub>2.5</sub> QDs at the MAPbI<sub>3</sub>/Spiro-OMeTAD interface. Frequency and life time ( $\tau_n$ ) as a function of incident light intensity for (a) control device, and (b) CsPbBr<sub>0.5</sub>I<sub>2.5</sub> QDs-incorporated device.

**Table S7.** Controlled intensity modulated photocurrent/photovoltage spectroscopy results of pristine PSCs (i.e., without PS-ligated CsPbBr<sub>0.5</sub>I<sub>2.5</sub> QDs sandwiched at the MAPbI<sub>3</sub>/Spiro-OMeTAD interface)

| <b>Light Intensity<br/>(W/m<sup>2</sup>)</b> | <b>Lifetime,<br/><math>\tau_n</math> (<math>\mu</math>s)</b> | <b>Transition<br/>time, <math>\tau_d</math> (<math>\mu</math>s)</b> | <b><math>\eta_{cc}</math></b> |
|----------------------------------------------|--------------------------------------------------------------|---------------------------------------------------------------------|-------------------------------|
| 100                                          | 10.78                                                        | 0.580                                                               | 94.62%                        |
| 200                                          | 8.52                                                         | 0.575                                                               | 93.25%                        |
| 300                                          | 7.42                                                         | 0.573                                                               | 92.28%                        |
| 400                                          | 6.77                                                         | 0.570                                                               | 91.58%                        |
| 500                                          | 6.18                                                         | 0.565                                                               | 90.85%                        |
| 600                                          | 4.92                                                         | 0.561                                                               | 88.60%                        |

**Table S8.** Controlled intensity modulated photocurrent/photovoltage spectroscopy results of PSCs with PS-ligated CsPbBr<sub>0.5</sub>I<sub>2.5</sub> QDs placed at the MAPbI<sub>3</sub>/Spiro-OMeTAD interface.

| <b>Light Intensity<br/>(W/m<sup>2</sup>)</b> | <b>Lifetime,<br/><math>\tau_n</math> (<math>\mu</math>s)</b> | <b>Transition<br/>time, <math>\tau_d</math> (<math>\mu</math>s)</b> | <b><math>\eta_{cc}</math></b> |
|----------------------------------------------|--------------------------------------------------------------|---------------------------------------------------------------------|-------------------------------|
| 100                                          | 26.57                                                        | 0.468                                                               | 98.24%                        |
| 200                                          | 25.30                                                        | 0.453                                                               | 98.20%                        |
| 300                                          | 23.71                                                        | 0.435                                                               | 98.16%                        |
| 400                                          | 22.03                                                        | 0.418                                                               | 98.10%                        |
| 500                                          | 21.04                                                        | 0.394                                                               | 98.12%                        |
| 600                                          | 20.97                                                        | 0.370                                                               | 98.23%                        |

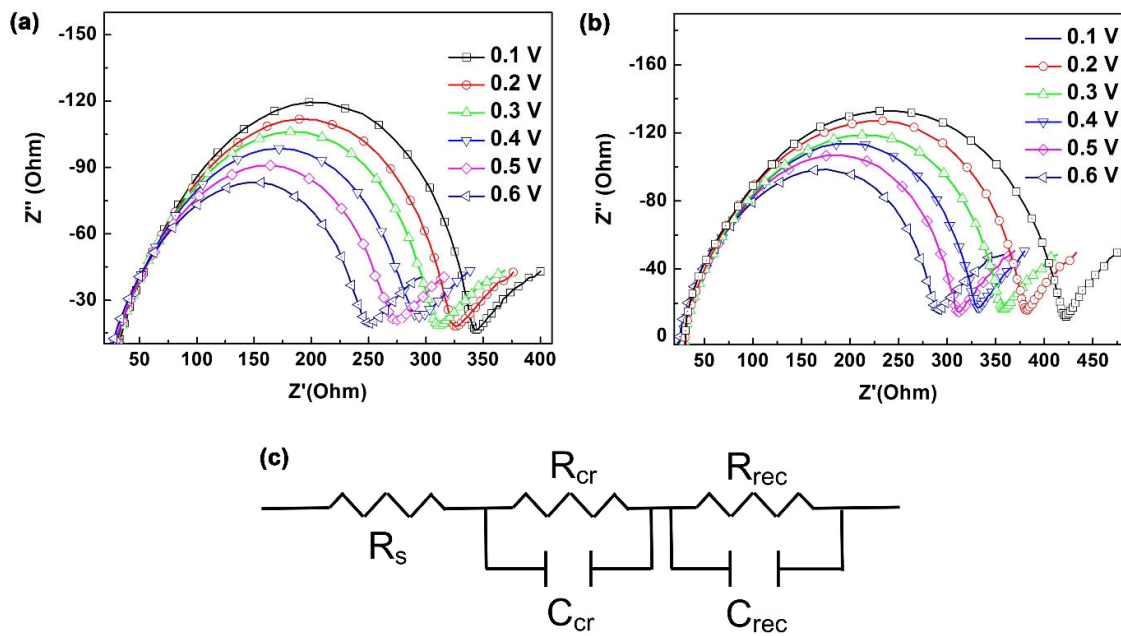

**Figure S19.** Nyquist plots of electrochemical impedance spectroscopy (EIS) measurements for (a) control device, (b)  $\text{CsPbBr}_{0.25}\text{I}_{2.5}$  QDs-incorporated device under illumination at various applied bias from 0.1 to 0.6 V. (c) The equivalent circuit for fitting the impedance spectroscopy.



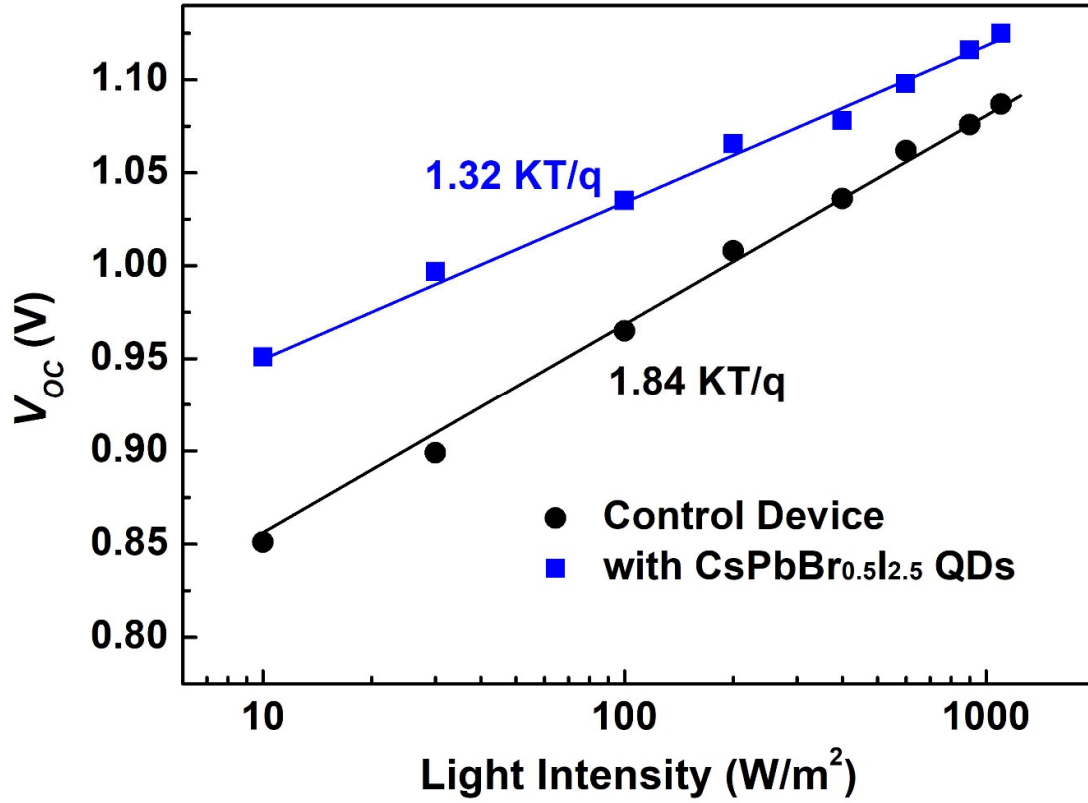

**Figure S20.**  $V_{oc}$  as a function of light intensity for both control and CsPbBr<sub>0.5</sub>I<sub>2.5</sub> QDs-incorporated devices. The reduced ideality factor  $n$  is determined by the equation:  $I = I_0 \exp(\frac{qV}{nk_B T})$ , where  $k_B$  is the Boltzmann constant,  $T$  is absolute temperature, and  $q$  is elementary charge.

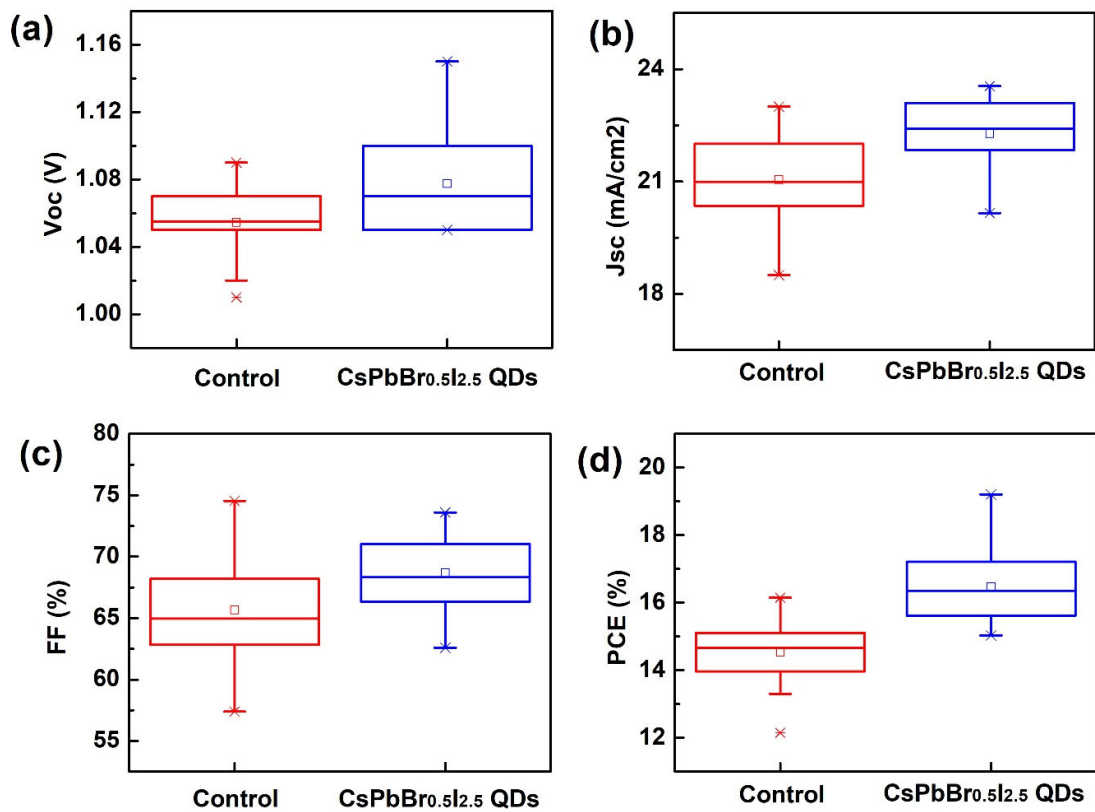

**Figure S21.** Device statistics of (a)  $V_{oc}$ , (b)  $J_{sc}$ , (c) fill factor, and (d)  $PCE$  of control and CsPbBr<sub>0.25</sub>I<sub>2.5</sub> QDs-incorporated devices.

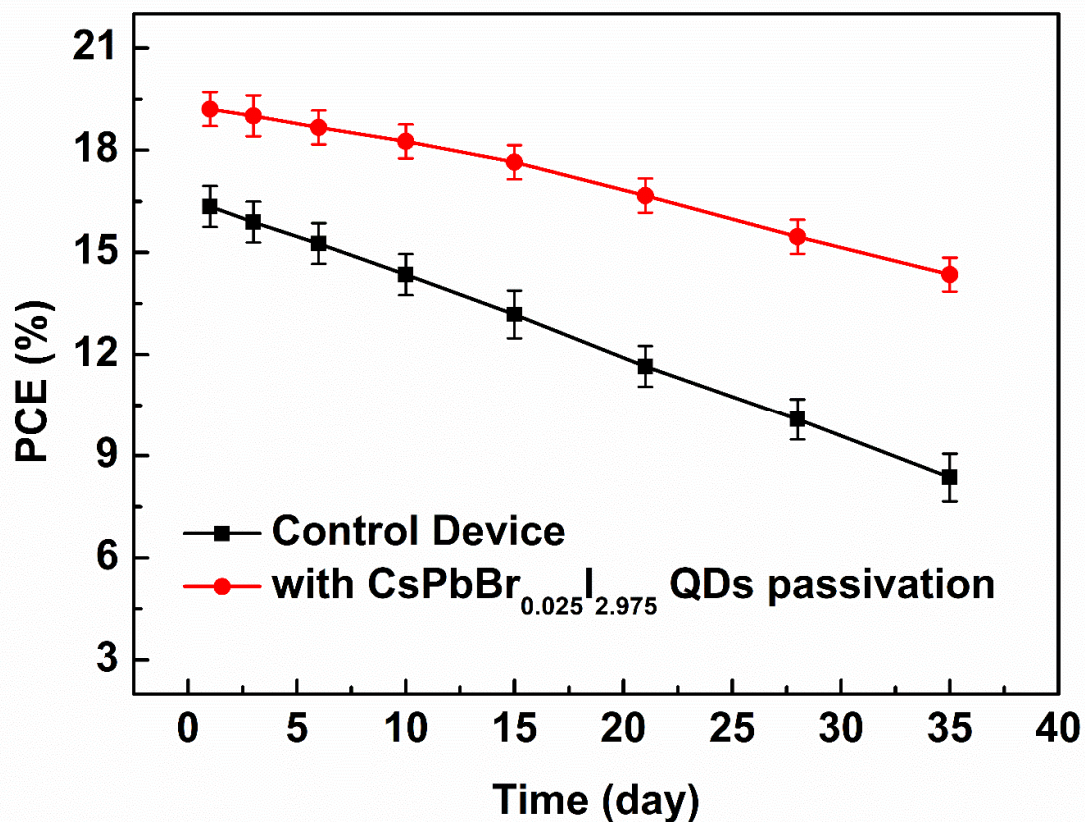

**Figure S22.** Stability of control and CsPbBr<sub>0.025</sub>I<sub>2.975</sub> QDs-incorporated devices without encapsulation yet stored in a desiccator at room temperature (~25 °C) with a relative humidity around 30%.

## References

1. J. H. Heo, S. H. Im, J. H. Noh, T. N. Mandal, C.-S. Lim, J. A. Chang, Y. H. Lee, H.-j. Kim, A. Sarkar and M. K. Nazeeruddin, *Nat. Photonics*, 2013, **7**, 486.
2. X. Pang, L. Zhao, M. Akinc, J. K. Kim and Z. Lin, *Macromolecules*, 2011, **44**, 3746.
3. X. Pang, L. Zhao, C. Feng and Z. Lin, *Macromolecules* 2011, **44**, 7176.
